# Supplementary material for: Incidence and Risk Assessment for Atrial Fibrillation at 5 Years: Hypertensive Diabetic Cohort
Source: MDPI journal article supplement (doi:10.3390/ijerph17103491), 2020-05-16
Supplement: s1 [file s1]

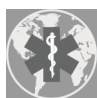

## Supplementary materials

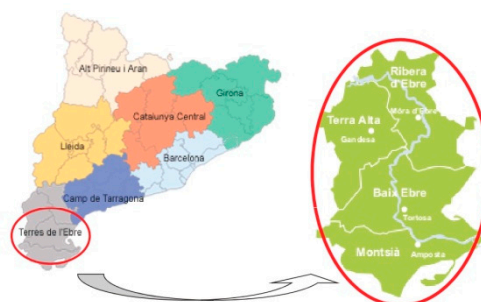

'Ebro Lands' is located in the south-west of Catalonia, in the southern part of river Ebre, and formed by four regions: Baix Ebre, Montsià, Terra Alta and Ribera d'Ebre (all into red circle). AFABE study (Baix Ebre, into green circle). The figure shows the relationship between the subjects in previous study AFABE and those ones included in the current study.

**Figure S1.** Current territory study map.

**Table S1.** Continuous basal variables.

| Continuous variables                  | Units             | N     | Variable modeling                                                                                                   |
|---------------------------------------|-------------------|-------|---------------------------------------------------------------------------------------------------------------------|
| Following-time                        | years             | 8,237 | Average following-time years/patient from 01/01/2013 to patient's death or until the end of the study (31/12/2017). |
| Age                                   | years             | 8,237 | Age (years-old) at the inclusion                                                                                    |
| Weight                                | kg                | 4,708 | Weight measures average in following time                                                                           |
| BMI <sup>a</sup>                      | kg/m <sup>2</sup> | 3,504 | BMI measures average in following time                                                                              |
| Systolic blood pressure (SBP)         | mmHg              | 6,309 | SBP measures average in following time                                                                              |
| Diastolic blood pressure (DBP)        | mmHg              | 6,253 | DBP measures average in following time                                                                              |
| Heart rate (HR)                       | bpm               | 5,501 | Heart rate measures average in following time                                                                       |
| Glycated haemoglobin (HbA1c)          | %                 | 5,793 | HbA1c measures average in following time                                                                            |
| CHA <sub>2</sub> DS <sub>2</sub> VASc |                   | 8,237 | CHA <sub>2</sub> DS <sub>2</sub> VASc measures average in following time                                            |

<sup>a</sup> Body mass index.

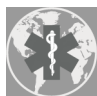

**Table S2.** Categorical basal variables.

|                                   | Units                      | Variable modeling                                                                                                                                          |
|-----------------------------------|----------------------------|------------------------------------------------------------------------------------------------------------------------------------------------------------|
| Gender                            |                            | Registered condition in the medical history                                                                                                                |
| Diabetes mellitus 2               | mg/dL                      | Basal glycemia > 126 mg/dL twice; glycemia at 2 hours of the TTOG > 200 mg/dL twice; random glycemia > 200 mg/dL and typical symptoms; HbA1c > 6.5% twice. |
| Insulin                           |                            | Registered condition in the electronic prescription                                                                                                        |
| Oral antidiabetics                |                            | Registered condition in the electronic prescription                                                                                                        |
| Hypertension                      | mmHg                       | Blood pressure > 140/90mmHg (three consecutive measures).                                                                                                  |
| Beta-blockers                     |                            | Registered condition in the electronic prescription                                                                                                        |
| Calcium antagonists               |                            | Registered condition in the electronic prescription                                                                                                        |
| ACE inhibitors- ARBs <sup>a</sup> |                            | Registered condition in the electronic prescription                                                                                                        |
| Diuretics                         |                            | Registered condition in the electronic prescription                                                                                                        |
| Hypercholesterolemia              | mg/dL                      | One total cholesterol > 250mg/dL                                                                                                                           |
| Myocardial infarction             |                            | Registered condition in the ICD-10                                                                                                                         |
| Peripheral vascular disease       |                            | Registered condition in the ICD-10                                                                                                                         |
| Valvular disease                  |                            | Registered condition in the ICD-10                                                                                                                         |
| Heart failure                     |                            | Registered condition in the ICD-10                                                                                                                         |
| Thromboembolism                   |                            | Registered condition in the ICD-10                                                                                                                         |
| Chronic renal insufficiency       | ml/min/1.73 m <sup>2</sup> | Glomerular filtration < 60 ml/min/1.73 m <sup>2</sup>                                                                                                      |
| Dementia                          |                            | Registered condition in the ICD-10                                                                                                                         |

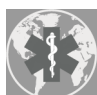

**Table S3.** Multivariable-Adjusted by Sex and Interaction for Atrial Fibrillation Risk Factors in the Overall Sample.

| Variable                                                                 | Interaction | Sex   | Hazard Ratios       | P Value | Relative Risk Ratio (CI95%) (Women/Men) |
|--------------------------------------------------------------------------|-------------|-------|---------------------|---------|-----------------------------------------|
| <b>**Age (years) (<math>\bar{x} \pm ds</math>)</b>                       | < 0.001     | Women | 1.06 (1.01–1.03)    | 0.001   | 0.98 (0.89–1.07)                        |
|                                                                          |             | Men   | 1.08 (1.04–1.12)    | 0.01    |                                         |
| <b>**Weight (kg) (<math>\bar{x} \pm ds</math>)</b>                       | < 0.001     | Women | 1.01 (0.98–1.03)    | 0.372   | 0.99 (0.96–1.02)                        |
|                                                                          |             | Men   | 1.02 (1.01–1.04)    | 0.001   |                                         |
| <b>BMI<sup>d</sup>(kg/m<sup>2</sup>) (<math>\bar{x} \pm ds</math>)</b>   | 0.522       | Women | 1.04 (0.97–1.10)    | 0.276   | 1.01 (0.95–1.07)                        |
|                                                                          |             | Men   | 1.02 (0.97–1.06)    | 0.611   |                                         |
| <b>**Diastolic blood pressure (mmHg) (<math>\bar{x} \pm ds</math>)</b>   | 0.496       | Women | 0.99 (0.96–1.03)    | 0.85    | 0.95 (0.90–1.0)                         |
|                                                                          |             | Men   | 1.04 (0.99–1.04)    | 0.286   |                                         |
| <b>**Heart rate (bpm)</b>                                                | < 0.001     | Women | 0.89 (0.69–1.15)    | 0.191   | 0.89 (0.64–1.14)                        |
|                                                                          |             | Men   | 0.99 (0.97–1.01)    | 0.444   |                                         |
| <b>HbA1c<sup>e</sup> n (%)</b>                                           | 0.496       | Women | 0.89 (0.69–1.15)    | 0.374   | 0.96 (0.54–1.02)                        |
|                                                                          |             | Men   | 0.92 (0.77–1.11)    | 0.392   |                                         |
| <b>Peripheral vascular disease n (%)</b>                                 | 0.24        | Women | 1.62 (0.86–48.2.64) | 0.152   | 1.04 (0.79–1.25)                        |
|                                                                          |             | Men   | 1.55 (1.08–2.11)    | 0.075   |                                         |
| <b>Valvular disease n (%)</b>                                            | 0.24        | Women | 0.61 (0.22–1.72)    | 0.35    | 0.83 (0.0–2.48)                         |
|                                                                          |             | Men   | 0.73 (0.26–2)       | 0.539   |                                         |
| <b>**CHA<sub>2</sub>DS<sub>2</sub>VASc (<math>\bar{x} \pm ds</math>)</b> | 0.003       | Women | 3.45 (1.56–7.63)    | 0.002   | 2.97 (0.0–6.66)                         |
|                                                                          |             | Men   | 1.16 (0.67–1.99)    | 0.589   |                                         |
| <b>**Oral antidiabetics n (%)</b>                                        | 0.35        | Women | 0.96 (0.52–1.76)    | 0.893   | 1.35 (0.29–2.41)                        |
|                                                                          |             | Men   | 0.71 (0.40–1.28)    | 0.258   |                                         |
| <b>**Beta-blockers n (%)</b>                                             | 0.349       | Women | 0.88 (0.50–1.55)    | 0.644   | 1.14 (0.3–2.01)                         |
|                                                                          |             | Men   | 0.77 (0.49–1.19)    | 0.232   |                                         |
| <b>**Calcium antagonists n (%)</b>                                       | 0.803       | Women | 0.87 (0.51–1.48)    | 0.614   | 0.67 (0.0–1.73)                         |
|                                                                          |             | Men   | 1.28 (0.83–2.0)     | 0.266   |                                         |
| <b>**ACE inhibitors- ARBs<sup>f</sup> (%)</b>                            | 0.264       | Women | 1.40 (0.78–2.49)    | 0.256   | 3.04 (1.87–4.21)                        |

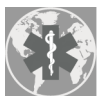

|                          |       |       |                  |       |                  |
|--------------------------|-------|-------|------------------|-------|------------------|
|                          |       | Men   | 0.46 (0.24–0.89) | 0.02  | 1.77 (0.77–2.77) |
|                          |       | Women | 1.31 (0.79–2.19) | 0.293 |                  |
| <b>**Diuretics n (%)</b> | 0.609 | Men   | 0.74 (0.49–1.10) | 0.137 |                  |

<sup>a</sup> Angiotensin converting enzyme inhibitors-angiotensin receptor blockers.
